# Supplementary material for: Menstrual Cycle Length and Patterns in a Global Cohort of Women Using a Mobile Phone App: Retrospective Cohort Study
Source: PubMed Central journal article supplement (PMC7381001; doi:10.2196/17109), 2020-06-24

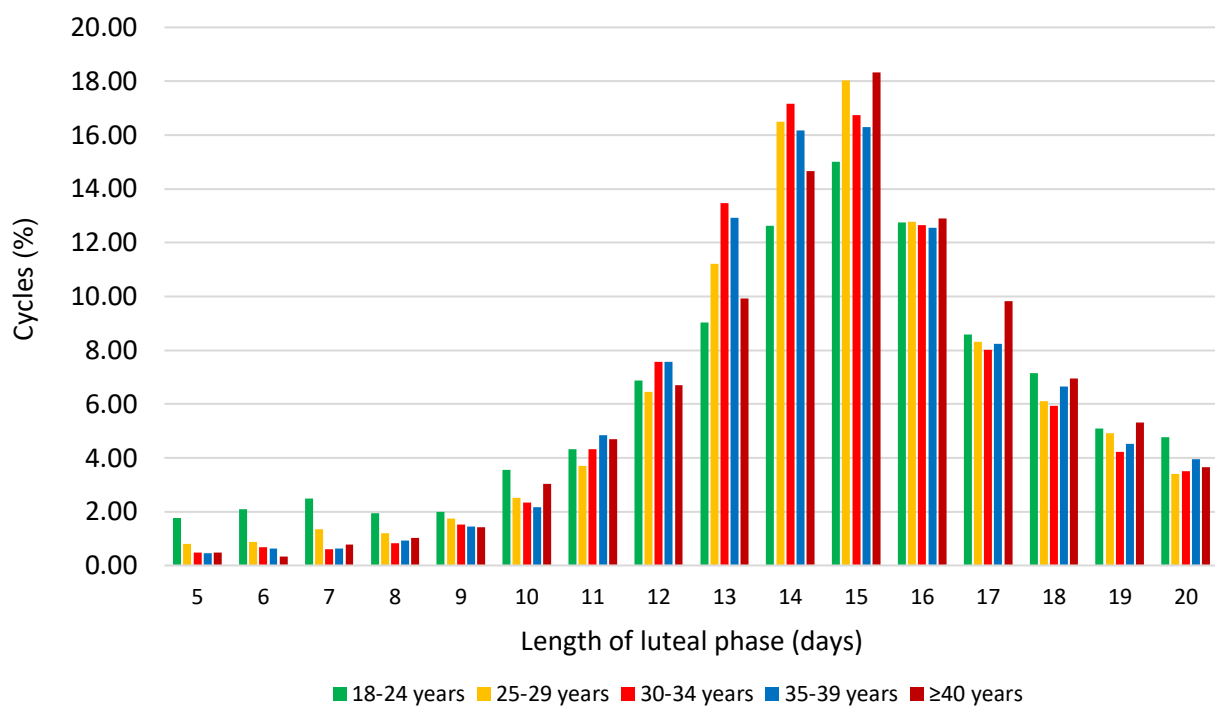

**Multimedia file 5:** Number of cycles and the luteal length, according to BMI.

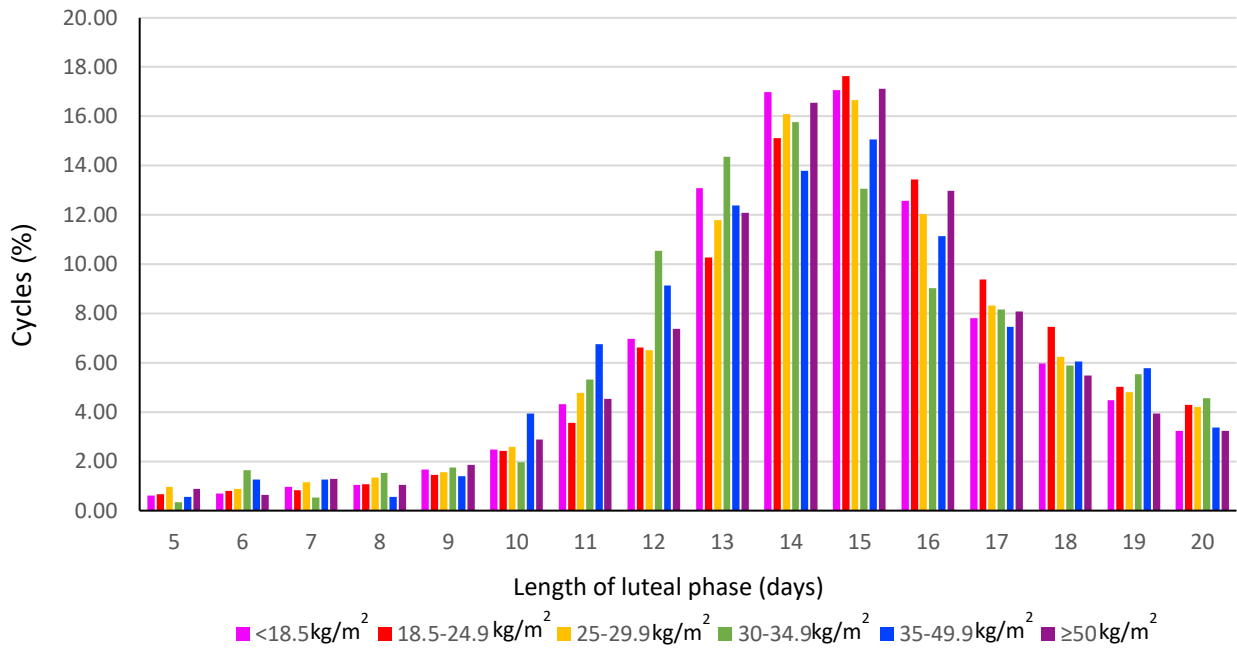

Supplement: jmir_v22i6e17109_app4.pdf [file jmir_v22i6e17109_app4.pdf]
